# Supplementary material for: The Cas4-Cas1-Cas2 complex mediates precise prespacer processing during CRISPR adaptation
Source: eLife journal article supplement (doi:10.7554/elife.44248), 2019-04-25
Supplement: supp [file elife-44248-supp-v2.zip]

Archive with 12 entries (12 files):
- elife_poa_e44248_Figure_2_figure_supplement_2.ai
- elife_poa_e44248_Figure_2_figure_supplement_3.ai
- elife_poa_e44248_Figure_2_figure_supplement_1.ai
- elife_poa_e44248_Figure_2_figure_supplement_5.ai
- elife_poa_e44248_Figure_2_figure_supplement_4.ai
- elife_poa_e44248_Figure_4_figure_supplement_1.ai
- elife_poa_e44248_Figure_1_figure_supplement_2.ai
- elife_poa_e44248_Figure_5_figure_supplement_1.ai
- elife_poa_e44248_Figure_1_figure_supplement_1.ai
- elife_poa_e44248_Figure_2_figure_supplement_6.ai
- elife_poa_e44248_Figure_3_figure_supplement_1.ai
- elife_poa_e44248_Transparent_Reporting_File.pdf
